# Supplementary material for: Acinetobacter baumannii under Acidic Conditions Induces Colistin Resistance through PmrAB Activation and Lipid A Modification
Source: MDPI journal article supplement (doi:10.3390/antibiotics12050813), 2023-04-26
Supplement: s1 [file s1]

## Article

# ***Acinetobacter baumannii* under Acidic Conditions Induces Colistin Resistance through PmrAB Activation and Lipid A Modification**

## **Supplementary Materials**

### *Construction of $\Delta pmrA$ and $\Delta pmrB$ mutant strains in *A. baumannii* ATCC 17978*

The deletion mutants of  $\Delta A1S\_2751$  (*pmrA*) and  $\Delta A1S\_2750$  (*pmrB*) in *A. baumannii* ATCC 17978 were constructed using markerless gene-deletion method (Supplementary Figure S1A and S1B). The upstream and downstream regions of *A1S\_2751* were amplified using the primer sets of 2751\_Up\_SpeI (F)/2751\_Up (R), and 2751\_Down (F)/2751\_Down (R), respectively (Supplementary Table S1). The upstream and downstream regions of *A1S\_2750* were amplified using the primer sets of 2750\_Up\_SpeI (F)/2750\_Up (R), and 2750\_Down (F)/2750\_Down (R), respectively. The *nptI*, conferring resistance to kanamycin, was amplified using the primer sets of 2751\_NptI (F)/NptI\_ApaI (R), and 2750\_NptI (F)/NptI\_ApaI (R). The three PCR products consisting of upstream and downstream regions of target gene and *nptI* were assembled by overlap extension PCR using the 2751\_Up\_SpeI (F)/NptI\_ApaI (R) primers for the  $\Delta pmrA$  mutant, and 2750\_Up\_SpeI (F)/NptI\_ApaI (R) primers for the  $\Delta pmrB$  mutant. The assembled DNA fragments and pDM4 plasmid vector were double-digested using *SpeI* (Enzymomics, Korea) and *ApaI* (Takara, Japan) restriction enzymes, and then ligated using T4 DNA ligase (Toyobo, Japan). The constructed plasmids were transformed to *E. coli* DH5 $\alpha$  by heat-shock method. The colonies containing the constructed plasmids were selected on LB plates containing kanamycin and chloramphenicol. The plasmids were harvested using a plasmid mini-prep kit (GeneAll, Korea) and the exact sequences were analyzed (Macrogen, Korea). The purified plasmids were transformed to the conjugal donor *E. coli* SM10, and then transferred to *A. baumannii* ATCC 17978 by conjugation. The mutant strains that accomplished cross-over homologous-recombination were selected on LB plates containing kanamycin as the first selection, and then selected on the LB plates containing 10% sucrose. Deletion of the genes was confirmed by PCR analysis using 2750\_Up\_SpeI (F) and 2751\_Down (R) primers (Supplementary Figure S1D). The  $\Delta pmrA$  and  $\Delta pmrB$  mutants were named HJ2751D and HJ2750D, respectively (Table 1).

### *Construction of *pmrA*-complemented *A. baumannii* strain*

For the construction of the *pmrA*-complemented *A. baumannii* strain, the *pmrA* coding and *ompA* promoter regions were amplified using the primer sets of OmpA\_2751 (F)/2751\_T1 (R) and EcoRI\_OmpA (F)/OmpA (R) using *A. baumannii* ATCC 17978 as a template (Supplementary Table S1). T1 terminator was amplified using the primer sets of 2751\_T1 (F)/T1\_PstI (R) using the pOH4 plasmid as a template. Three PCR products consisting of *ompA* promoter, *A1S\_2751*, and T1 terminator were assembled by overlap extension PCR using the EcoRI\_OmpA (F)/T1\_PstI (R). The amplified PCR fragments were digested with *EcoRI* (Enzymomics, Korea) and *PstI* (Enzymomics), and then introduced into the *EcoRI* and *PstI* sites of pWH1266 plasmid with a source of a replication origin for *A. baumannii* (Supplementary Figure S1C). The constructed plasmids were transferred to *E. coli* DH5 $\alpha$  by heat-shock method and the colonies were selected on LB plates containing tetracycline. The plasmids were purified using plasmid mini-prep kit and the sequences were analyzed. The constructed plasmids were transformed to HJ2751D strain by electroporation (Supplementary Figure S1D). The *pmrA*-complemented strain was named HJ2751C (Table 1).

**Supplementary Table S1.** Oligonucleotide primers used in this study

| Primers                                                       | Sequence (5' to 3')                                                          |
|---------------------------------------------------------------|------------------------------------------------------------------------------|
| Construct for $\Delta pmrA$ and $\Delta pmrB$ mutants strains |                                                                              |
| 2751_Up_SpeI (F)                                              | <u>GGA CTA GTG</u> CTC GAC CAT ACT TAA AGT TAC ATC                           |
| 2751_Up (R)                                                   | GAG CCT AGA <u>ACA TGT</u> AAT TTA AAA TTT CGG GAC TTC<br>ATA AAA GTG        |
| 2751_Down (F)                                                 | <u>GTC CCG AAA TTT TAA ATT ACA</u> TGT TCT AGG CTC GCT<br>TAA G              |
| 2751_Down (R)                                                 | <u>CGA GGC AGA CGA</u> GCT CAT GCG GTA CG                                    |
| 2751_NptI (F)                                                 | <u>CAT GAG CTC</u> GTC TGC CTC GTG AAG AAG                                   |
| 2750_Up_speI (F)                                              | <u>GGA CTA GTC</u> AAC AGG TCA TTT TTT CAA TCG G                             |
| 2750_Up (R)                                                   | <u>GGA CTT CAT AAA AGT GTG</u> ATT ACG TAA GCT CTT GTT<br>TCA                |
| 2750_Down (F)                                                 | <u>GAG CTT ACG TAA TCA</u> CAC TTT TAT GAA GTC CCG AAA<br>TTT TAA ATT ATG    |
| 2750_Down (R)                                                 | <u>GAG GCA GAC</u> GGG TCA ATA ACG GTT TAG ATG G                             |
| 2750_NptI (F)                                                 | <u>CGT TAT TGA CCC</u> GTC TGC CTC GTG AAG AAG                               |
| NptI_ApaI (R)                                                 | <u>GTT GGG CCC</u> GAT CCG TCGACC TGC AGG                                    |
| Construct for <i>pmrA</i> -complemented strain                |                                                                              |
| EcoRI_OmpA (F)                                                | <u>GGA ATT CCG</u> AGT GTT ATA GTG AGC TCA ACT G                             |
| OmpA (R)                                                      | TGG ATA TCC TCC AGA GAT AAC AAT TGT TG                                       |
| OmpA_2751 (F)                                                 | <u>ATC TCT GGA GGA TAT CCA</u> TGA CAA AAA TCT TGA TGA<br>TTG AAG ATG ATT TT |
| 2751_T1 (R)                                                   | <u>GTT TTA TTT GAT GCC</u> TTA TGA TTG CCC CAA ACG G                         |
| 2751_T1 (F)                                                   | <u>GGG GCA ATC ATA AGG</u> CAT CAA ATA AAA CGA AAG GC                        |
| T1_PstI (R)                                                   | <u>GAA CTG CAG</u> TCT AGG GCG GCG GAT TTG                                   |
| Construct for plasmid with FLAG-tagged <i>pmrA</i>            |                                                                              |
| EcoRI_pmrAB_promoter (F)                                      | <u>GGA ATT CGT</u> TCT CTG ATG ATG GTA CTG ATT ATG CG                        |
| Promoter_2751 (R)                                             | <u>CAT CAA GAT TTT TGT CAT</u> AAA CAG GGA AAT CTG TTT<br>ATT TCT TAA TG     |
| Promoter_2751 (F)                                             | <u>CAG ATT TCC CTG TTT</u> ATG ACA AAA ATC TTG ATG ATT<br>GAA GAT G          |
| FLAG_T1 (F)                                                   | <u>GAC TAC AAA GAC GAT GAC GAC AAG</u> TAA GCA TCA AAT<br>AAA ACG AAA GGC TC |
| 2751_FLAG (R)                                                 | <u>GTC TTT GTA GTC</u> TGA TTG CCC CAA ACG                                   |
| pWH1266 (F)                                                   | GCA ACT TTA TCC GCC TCC ATC                                                  |
| pWH1266 (R)                                                   | GAT TTC ATA CAC GGT GCC TGA C                                                |

\*Underlined sequences indicate regions that are not complementary to the templates.

**Supplementary Table S2.** Primers used in qPCR

| Primers    | Sequence (5' to 3')         | Target genes | References |
|------------|-----------------------------|--------------|------------|
| 16S rRNA F | GCACAAGCGGTGGAGCAT          | 16S rRNA     | This study |
| 16S rRNA R | CGAAGGCACCAATCCATCTC        |              |            |
| PmrA F     | GAGGTGGAATGGGTCAATAACG      | <i>pmrA</i>  | This study |
| PmrA R     | GGCAATCCTAAATCCAAAAGAATAAG  |              |            |
| PmrB F     | CTGTTGAGCAAGCGGGATTT        | <i>pmrB</i>  | This study |
| PmrB R     | CTGACTGACCTGAATCTGATAATCCTT |              |            |
| PmrC F     | CTGTTGAGCAAGCGGGATTT        | <i>pmrC</i>  | This study |
| PmrC R     | CTGACTGACCTGAATCTGATAATCCTT |              |            |

(A)

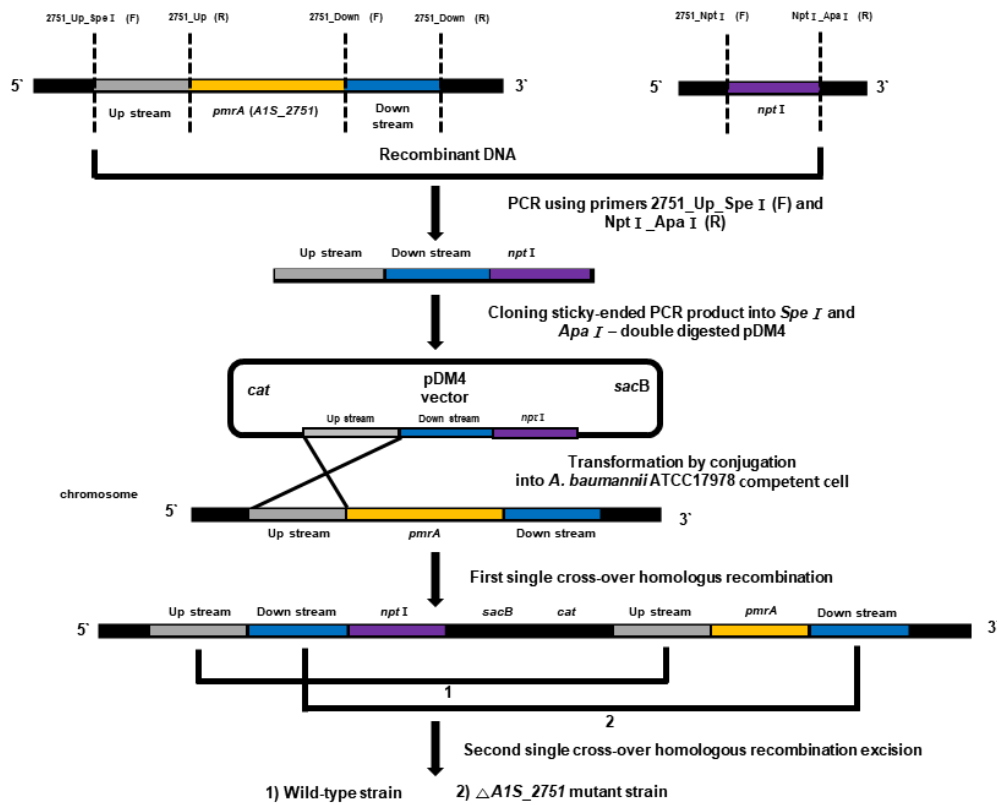

(B)

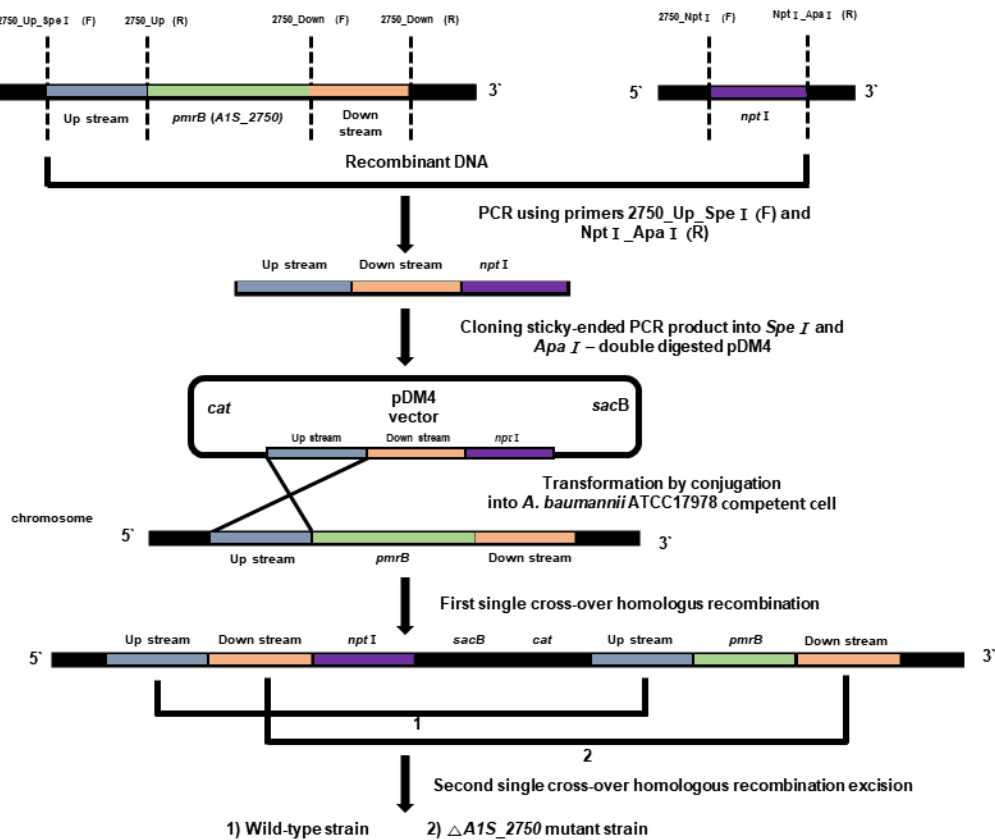

(C)

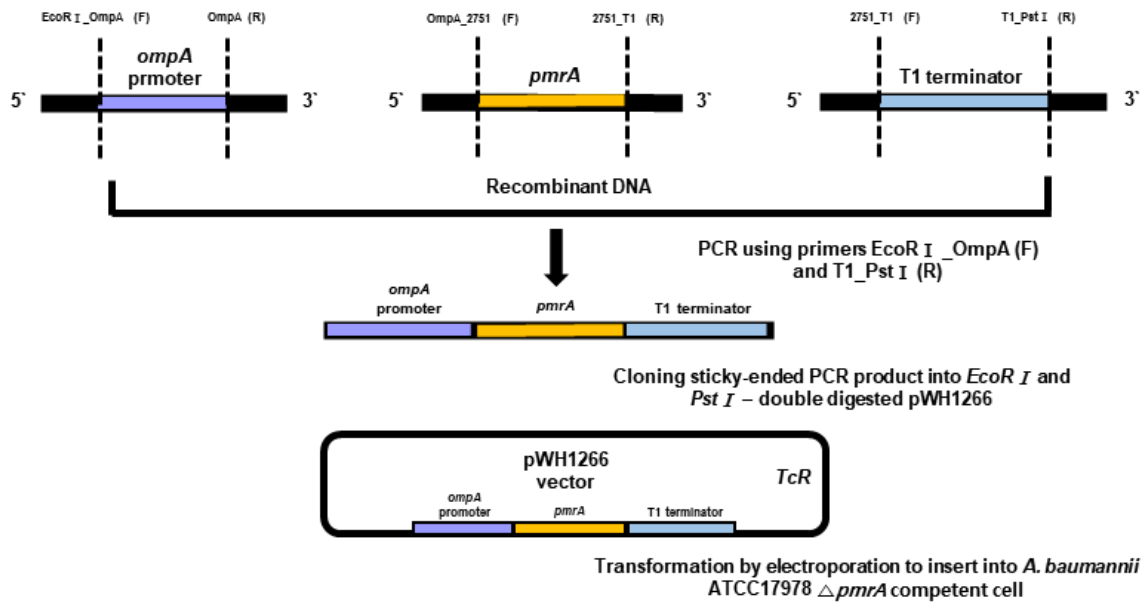

(D)

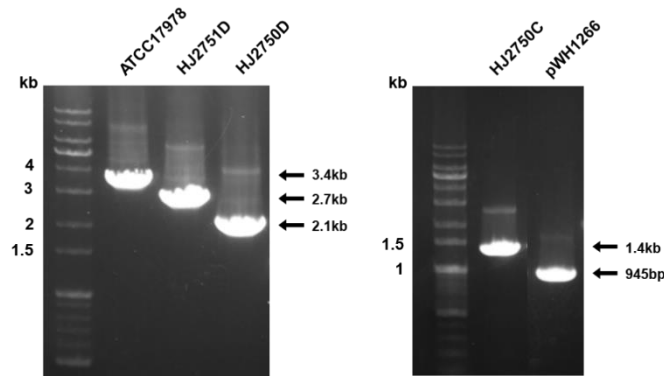

**Supplementary Figure S1.** Construction of the  $\Delta pmrA$ ,  $\Delta pmrB$ , and *pmrA*-complemented strains. The schematic diagrams for constructing  $\Delta pmrA$  (HJ2751D) (A),  $\Delta pmrB$  (HJ2750D) mutant (B) strains, and *pmrA*-complemented strain (HJ2751C) (C). (D) Deletion of *pmrA* and *pmrB* in HJ2751D and HJ2750D using 2750\_Up\_SpeI (F) and 2751\_Down (R) primers. The complementation of *pmrA* in HJ2751C using pWH1266 (F) and pWH1266 (R) primers (Supplementary Table S1). The amplicon size was 3,444 bp in the wild-type ATCC 17978, 2,775 bp in HJ2751D, 2,115 bp in HJ2750D, 1,442 bp in HJ2750C, and 945 bp in pWH1266 vector, respectively.
